# Supplementary material for: Three Steps to Adapt Case Studies for Synchronous and Asynchronous Online Learning
Source: PubMed Central journal article supplement — J Microbiol Biol Educ. 2021 Mar 31;22(1):22.1.22. doi: 10.1128/jmbe.v22i1.2337 (PMC8012036; doi:10.1128/jmbe.v22i1.2337), 2021-03-31
Supplement: JMBE-22-22-S001.pdf [file JMBE-22-22-S001.pdf]

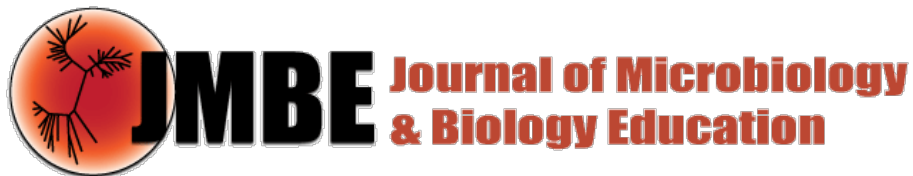

---

## Supplemental Materials

### for

## Three Steps to Adapt Case Studies for Synchronous and Asynchronous Online Learning

Andrea Bixler<sup>1\*</sup>, Melissa Eslinger<sup>2</sup>, Adam J. Kleinschmit<sup>3</sup>, Monica M. Gaudier-Diaz<sup>4</sup>,  
Usha Sankar<sup>5</sup>, Patricia Marsteller<sup>6</sup>, Carlos C. Goller<sup>7</sup>, and Sabrina Robertson<sup>4</sup>

<sup>1</sup>Clarke University, Science and Mathematics Department, Dubuque, IA 52001;

<sup>2</sup>U.S. Military Academy, Department of Chemistry & Life Science, West Point, NY 10996;

<sup>3</sup>University of Dubuque, Department of Natural and Applied Sciences, Dubuque, IA 52001;

<sup>4</sup>University of North Carolina, Department of Psychology & Neuroscience, Chapel Hill, NC 27599;

<sup>5</sup>Fordham University, Department of Biology, Bronx, NY 10458;

<sup>6</sup>North Carolina State University, Department of Biological Sciences, Raleigh, NC 27695

## Table of Contents

(Total pages 7)

Appendix 1: Additional resources

Appendix 2: Summative assessment and technology issues

\*Corresponding author. Mailing address: Biology,  
Clarke University, 1550 Clarke Dr., Dubuque, IA 52001.  
Phone: 563-588-6616. E-mail: [andrea.bixler@clarke.edu](mailto:andrea.bixler@clarke.edu).  
Received: 29 September 2020, Accepted: 20 December 2020,  
Published: 31 March 2021

©2021 Author(s). Published by the American Society for Microbiology. This is an Open Access article distributed under the terms of the Creative Commons Attribution-Noncommercial-NoDerivatives 4.0 International license (<https://creativecommons.org/licenses/by-nc-nd/4.0/> and <https://creativecommons.org/licenses/by-nc-nd/4.0/legalcode>), which grants the public the nonexclusive right to copy, distribute, or display the published work.

## Appendix 1: Additional resources

**Table S1.** Where to find case studies and other lessons that could be modified into distance-learning cases

| Resource                                      | Web address                                                                                                                                                                   |
|-----------------------------------------------|-------------------------------------------------------------------------------------------------------------------------------------------------------------------------------|
| Case Studies in Microscopy                    | <a href="https://courses.cit.cornell.edu/biomi290/microscopycases/">https://courses.cit.cornell.edu/biomi290/microscopycases/</a>                                             |
| CourseSource                                  | <a href="http://www.coursesource.org/">www.coursesource.org/</a>                                                                                                              |
| Data Nuggets                                  | <a href="http://datanuggets.org">datanuggets.org</a>                                                                                                                          |
| Data Science Cases with R                     | <a href="http://rdatasciencecases.org/">http://rdatasciencecases.org/</a>                                                                                                     |
| Ecology Disrupted                             | <a href="https://www.amnh.org/learn-teach/curriculum-collections/ecology-disrupted">https://www.amnh.org/learn-teach/curriculum-collections/ecology-disrupted</a>             |
| EvoEd Cases                                   | <a href="http://www.evo-ed.org/">http://www.evo-ed.org/</a>                                                                                                                   |
| HHMI BioInteractive                           | <a href="http://www.biointeractive.org/">www.biointeractive.org/</a>                                                                                                          |
| MathBench                                     | <a href="https://mathbench.umd.edu/index.html">https://mathbench.umd.edu/index.html</a>                                                                                       |
| MERLOT                                        | <a href="https://www.merlot.org/merlot/">https://www.merlot.org/merlot/</a>                                                                                                   |
| Michigan Sustainability Cases                 | <a href="https://www.learnkala.com/">https://www.learnkala.com/</a>                                                                                                           |
| Molecular CaseNet                             | <a href="https://molecular-casenet.rcsb.org/">https://molecular-casenet.rcsb.org/</a>                                                                                         |
| Native Cases Studies                          | <a href="http://nativecases.evergreen.edu/">http://nativecases.evergreen.edu/</a>                                                                                             |
| National Center for Case Study                | <a href="http://sciencecases.lib.buffalo.edu">sciencecases.lib.buffalo.edu</a>                                                                                                |
| Teaching in Science                           |                                                                                                                                                                               |
| National Center for Science Education         | <a href="http://ncse.ngo/">ncse.ngo/</a>                                                                                                                                      |
| NeuroCaseNet                                  | <a href="https://qubeshub.org/community/groups/neurocasenet">https://qubeshub.org/community/groups/neurocasenet</a>                                                           |
| OER Commons                                   | <a href="http://www.oercommons.org/">www.oercommons.org/</a>                                                                                                                  |
| Science Education Resource Center             | <a href="https://serc.carleton.edu/index.html">https://serc.carleton.edu/index.html</a>                                                                                       |
| National Socio-Environmental Synthesis Center | <a href="https://www.sesync.org/for-you/educator/case-studies/case-study-collection">https://www.sesync.org/for-you/educator/case-studies/case-study-collection</a>           |
| Teaching Evolution through Human Examples     | <a href="https://humanorigins.si.edu/education/teaching-evolution-through-human-examples">https://humanorigins.si.edu/education/teaching-evolution-through-human-examples</a> |

|                                                                                                                                                                |                                                                                                                                                                                                                          |
|----------------------------------------------------------------------------------------------------------------------------------------------------------------|--------------------------------------------------------------------------------------------------------------------------------------------------------------------------------------------------------------------------|
| Teaching Issues & Experiments in Ecology<br>Journals such as <i>Case Studies in the Environment</i> and <i>Journal of Undergraduate Neuroscience Education</i> | <a href="https://esa.org/tice2/">https://esa.org/tice2/</a><br><br><a href="https://online.ucpress.edu/cse">https://online.ucpress.edu/cse</a> and <a href="https://www.funjournal.org/">https://www.funjournal.org/</a> |
|----------------------------------------------------------------------------------------------------------------------------------------------------------------|--------------------------------------------------------------------------------------------------------------------------------------------------------------------------------------------------------------------------|

**Table S2.** Where to find or produce videos

| Tools to create your own videos                        | Sources for existing videos                                                                                                               |
|--------------------------------------------------------|-------------------------------------------------------------------------------------------------------------------------------------------|
| Camtasia (\$)                                          | 2-minute Neuroscience                                                                                                                     |
| Doceri (whiteboard-style videos with voiceover)        | <a href="https://www.neuroscientificallychallenged.com/2-minute-neuroscience-videos">https://www.neuroscientificallychallenged.com/2-</a> |
| Edpuzzle.com (to integrate quiz questions into videos) | <a href="https://www.neuroscientificallychallenged.com/2-minute-neuroscience-videos">minute-neuroscience-videos</a>                       |
| iMotion (\$ stop-motion videos)                        | Amoeba Sisters <a href="https://www.amoebasisters.com/">https://www.amoebasisters.com/</a>                                                |
| Loom                                                   | CSHL DNA Learning Center <a href="https://dnalc.cshl.edu/">https://dnalc.cshl.edu/</a>                                                    |
| Mediasite                                              | HHMI BioInteractive <a href="https://www.biointeractive.org/">https://www.biointeractive.org/</a>                                         |
| Panopto (\$)                                           | Instructor resources provided with your textbook                                                                                          |
| PowerPoint voiceover                                   | <i>Journal of Visualized Experiments</i>                                                                                                  |
| Powtoon (simple animated videos)                       | <a href="https://www.jove.com/">https://www.jove.com/</a> (\$)                                                                            |
| Screencast-o-matic                                     | Teach.Genetics <a href="https://teach.genetics.utah.edu/">https://teach.genetics.utah.edu/</a>                                            |
| VoiceThread (\$ but may be integrated into your LMS)   | TED-Ed <a href="https://ed.ted.com/">https://ed.ted.com/</a>                                                                              |
| Zoom (\$) or Microsoft Teams                           | Your Genome <a href="https://www.yourgenome.org/">https://www.yourgenome.org/</a>                                                         |

\$=must be purchased

**Table S3.** Technology to facilitate group work for online case studies

| <b>Category</b>                                        | <b>Examples</b>                                                                                                        |
|--------------------------------------------------------|------------------------------------------------------------------------------------------------------------------------|
| Video conferencing platforms                           | Zoom (breakout rooms); Microsoft Teams (channels or breakout rooms with Collaboration space in the Classroom Notebook) |
| Shared documents                                       | Google Docs or OneNote for written work, data, presentations; Padlet or Google Jamboard for drawings                   |
| Online Discussion/Q&A forum                            | Your Learning Management System (LMS), Piazza, #GroupMe, Slack                                                         |
| Wikis                                                  | Your LMS; PBWorks                                                                                                      |
| Social annotation software                             | Diigo, Hypothes.is, NowComment, Perusall                                                                               |
| Concept mapping software (can be used collaboratively) | Cmap Tools, Mindomo, SpiderScribe                                                                                      |
| Video responses to prompts                             | VoiceThread, FlipGrid                                                                                                  |
| Polling                                                | Built into Zoom, Teams or your LMS; Poll Everywhere; Kahoot; Socrative                                                 |

## **Appendix 2: Summative assessment and technology issues**

### **Summative assessment**

While we have illustrated how individual student preparation, collaborative learning, and student synthesis can provide accountability and assessment across learning modalities, case learning outcomes can also be summatively assessed within exams (1). Exams can include multiple choice or short answer questions. Or exams could incorporate data from the case or similar research where students make conclusions based on provided data or perform analyses on their own. Moreover, a new case could serve as an assessment in lieu of an exam (2). Particularly for asynchronous environments, this lessens opportunities for cheating as most case repositories strictly protect their answer keys. We have also extended cases by reintroducing them later in the course, adding new concepts. For instance, a case on evolution was expanded to assess content in ecology. This helps students view assessments not just as an exam but as a learning experience where connections across subdisciplines can be made (3).

### **Advantages and disadvantages of technology**

On a practical note, technology and course delivery is exponentially changing. The downside of this is that instructors must test screen-sharing, breakout rooms, or other tools used, and practice to increase proficiency. This will also increase understanding of the additional time required to switch between programs or screens. Testing technology with another instructor or TA will clarify the student experience and highlight how they will find or interact with the learning modules. Faculty should plan time to teach students how to interact with the technology and knowledge management systems. This can be done via screen sharing during synchronous sessions or a screencast video of the steps needed for asynchronous classes.

The upside of changing technology is finding new ways to incorporate activities that in the past required paper, pen and physical interaction. For example, we have used card sorts (e.g., 4) to challenge groups with categorization of terms (e.g., students arrange cards that list facts about different fossil fuels under the headings “petroleum,” “coal,” “natural gas” or “all 3”). Peer interaction in this activity is quite high (5). To implement online, a shared document (Google Doc or Jamboard) can be created with terms in text boxes. Instead of arranging physical cards, students use their mouse to move the text boxes.

We encourage dialogue with IT staff, faculty learning center, or other instructors to troubleshoot and brainstorm solutions.

## References

1. Herreid CF. 2001. When justice peeks: evaluating students in case study teaching. *J Coll Sci Teach* 30(7):430-433.
2. Haswell M. 2020. Using BioInteractive resources in an interactive evolution unit. <http://biointeractive.org> (accessed September 28, 2020).
3. Yadav A, Lundeberg M, DeSchryver M, Dirkin K, Schiller NA, Maier K, Herreid CF. 2007. Teaching science with case studies: a national survey of faculty perceptions of the benefits and challenges of using cases. *J Coll Sci Teach* 37(1):34-38.
4. The Teacher Tool Kit. Card sort. <https://www.theteachertoolkit.com/index.php/tool/card-sort> (accessed September 28, 2020).
5. Rugg G, McGeorge P. 1997. The sorting techniques: a tutorial paper on card sorts, picture sorts and item sorts. *Expert Syst* 14(2):80-93.
